# Supplementary material
Source: publisher figshare collection journal article supplement (https://acs.figshare.com/ndownloader/files/4327762)
Supplement: Supplementary file 1 [file 4327762]

# Supporting Information

## Thermoreversible Radial Growth of Micellar Assembly for Hydrogel Formation Using Zwitterionic Oligopeptide Copolymer

**Bo Gyu Choi,<sup>†,‡</sup> So-Hye Cho,<sup>§</sup> Hyesun Lee,<sup>†,‡</sup> Myung Hwa Cha,<sup>†</sup> Kwideok Park,<sup>†</sup> Byeongmoon  
Jeong,<sup>\*,‡</sup> and Dong Keun Han<sup>\*,†</sup>**

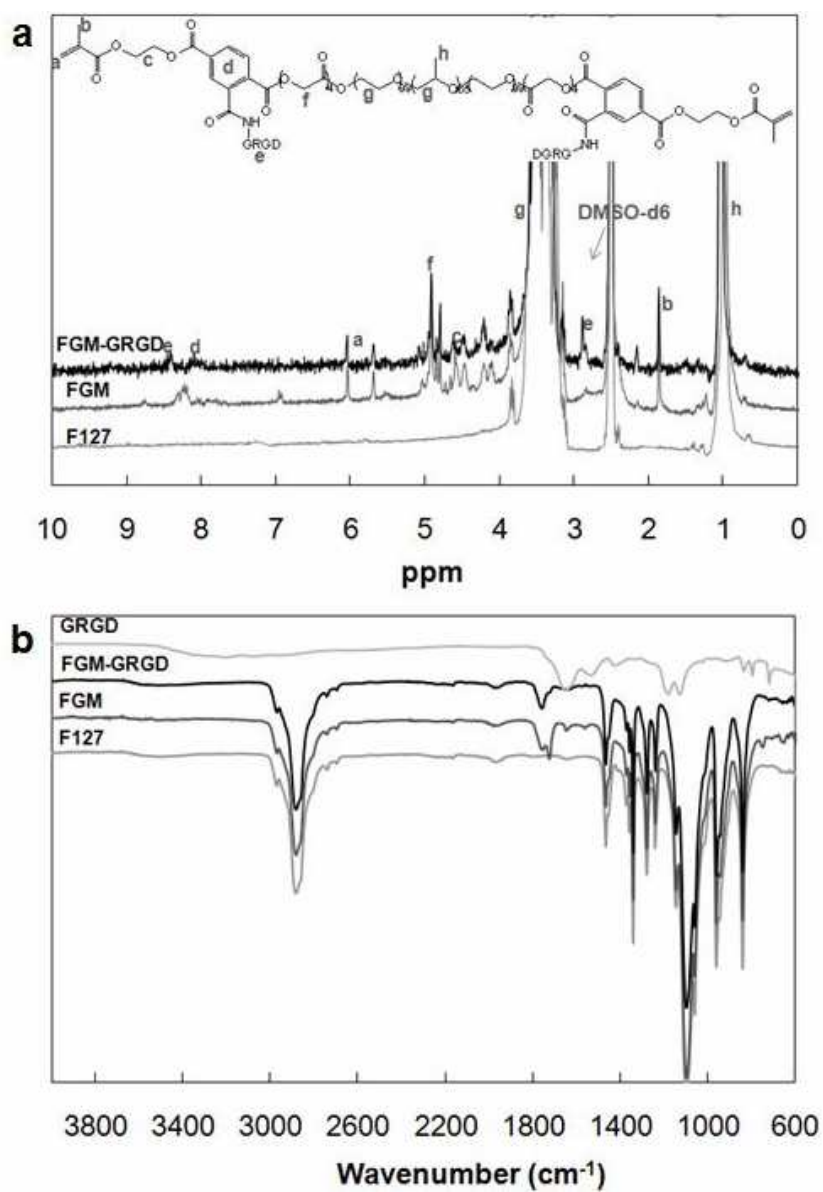

**Figure S1.** Characterization of synthesized polymers. (a)  $^1\text{H}$ -NMR spectra of F127, FGM, and FGM-GRGD in DMSO- $d_6$ . (b) FTIR spectra of F127, FGM, and FGM-GRGD.

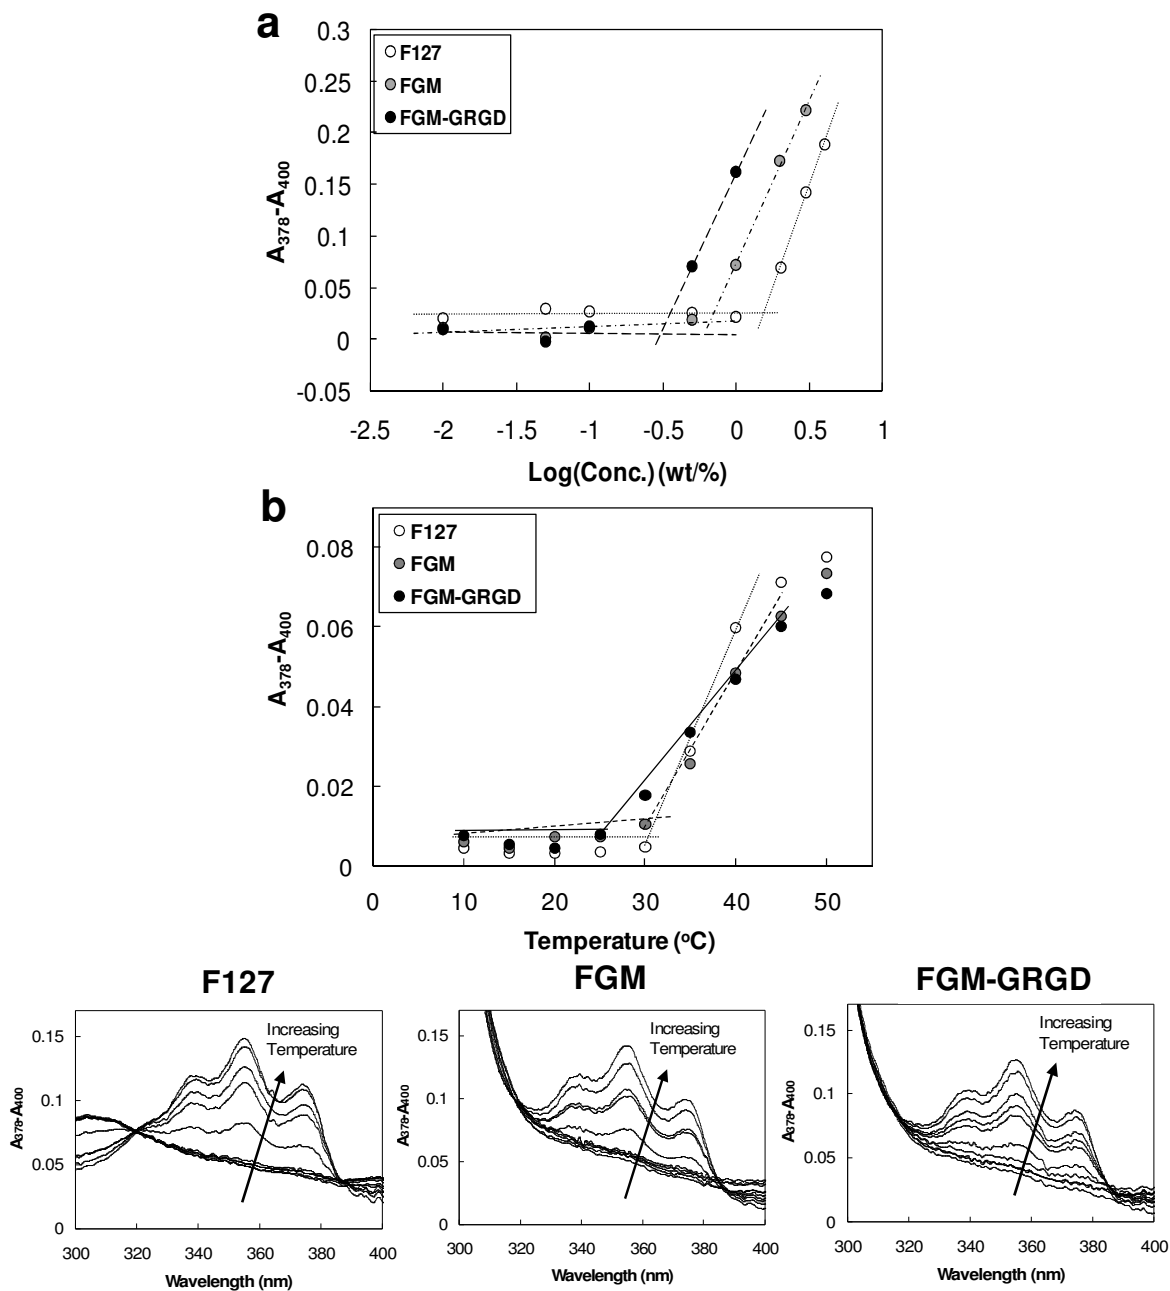

**Figure S2.** Dye solubilization in the F127, FGM, and FGM-GRGD aqueous solutions (0.1 wt.%). Change of absorbance ( $A_{378} - A_{400}$ ) as a function of concentration at room temperature (a) and as a function of temperature (b).

### FGM-GRGL

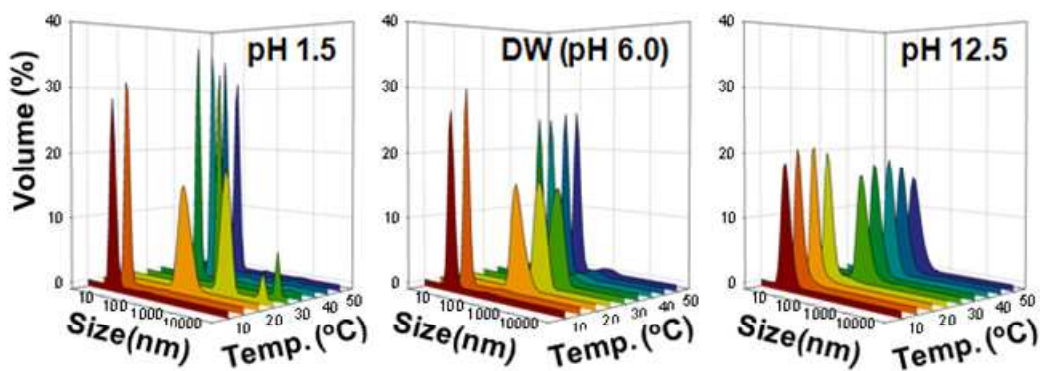

### FGM-GFGD

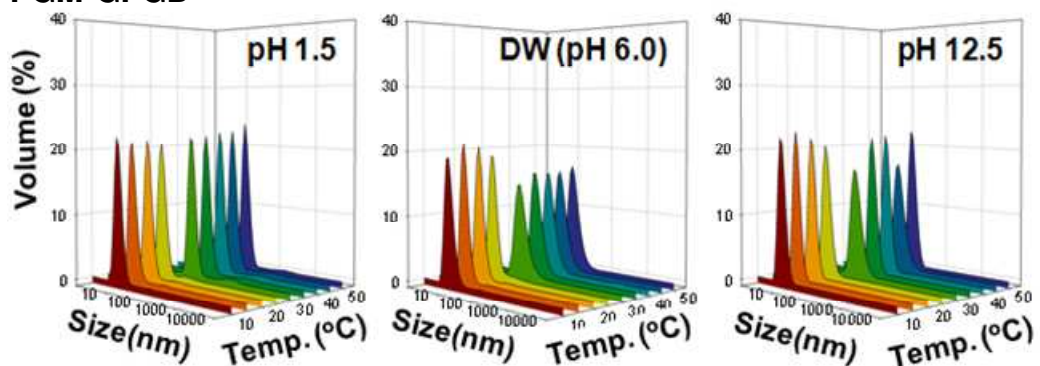

**Figure S3.** Structural effect of oligopeptides and pH effect on the nanoassembly of FGM-OligoP. Apparent sizes of FGM-GRGL and FGM-GFGD in water (0.1 wt.%) as a function of temperature at pH 1.5, 6.0, and 12.5.

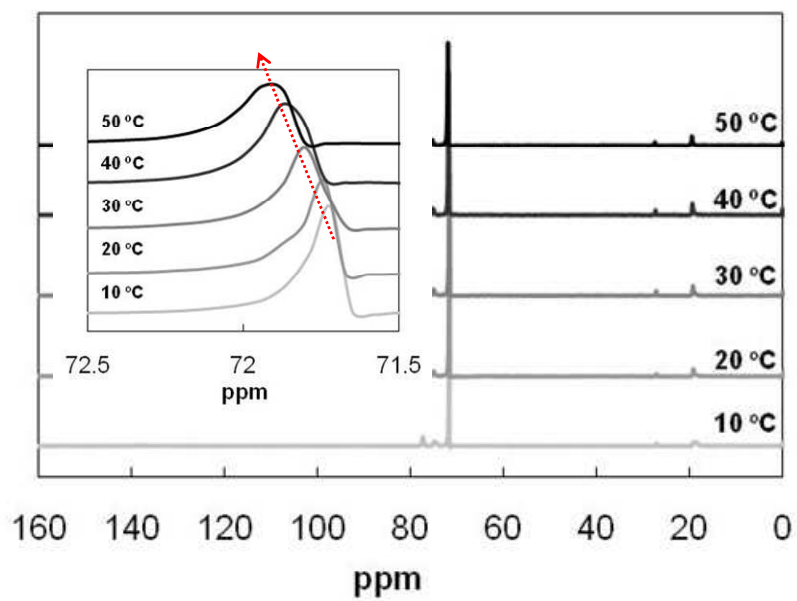

**Figure S4.**  $^{13}\text{C}$ -NMR spectra of FGM-GRGD in  $\text{D}_2\text{O}$  as a function of temperature. The solution was equilibrated for 20 min at each temperature before measurement.

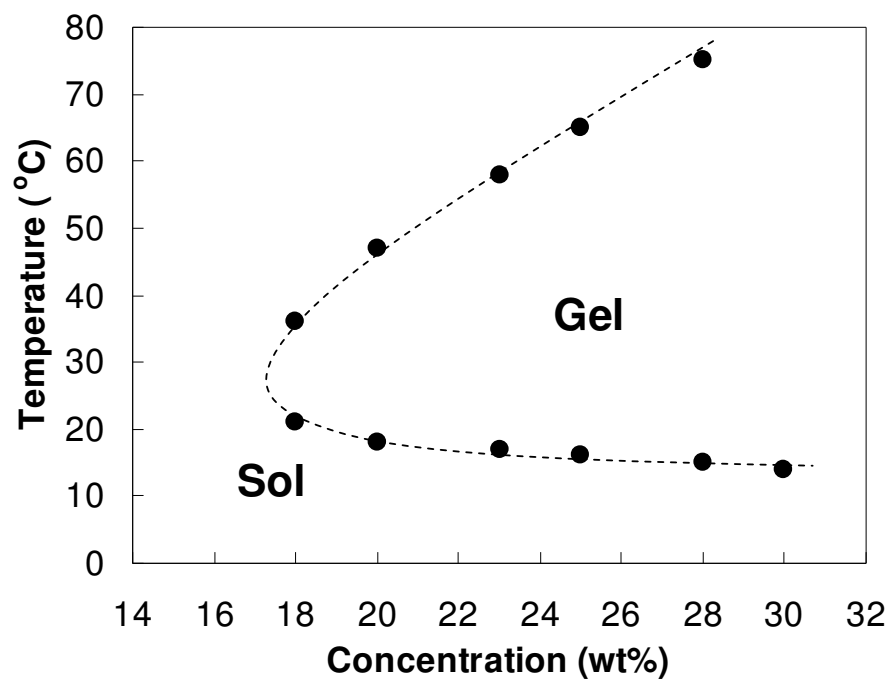

**Figure S5.** Phase diagram of FGM-GRGD aqueous solutions. The transition temperature was determined by the test-tube inverting method.

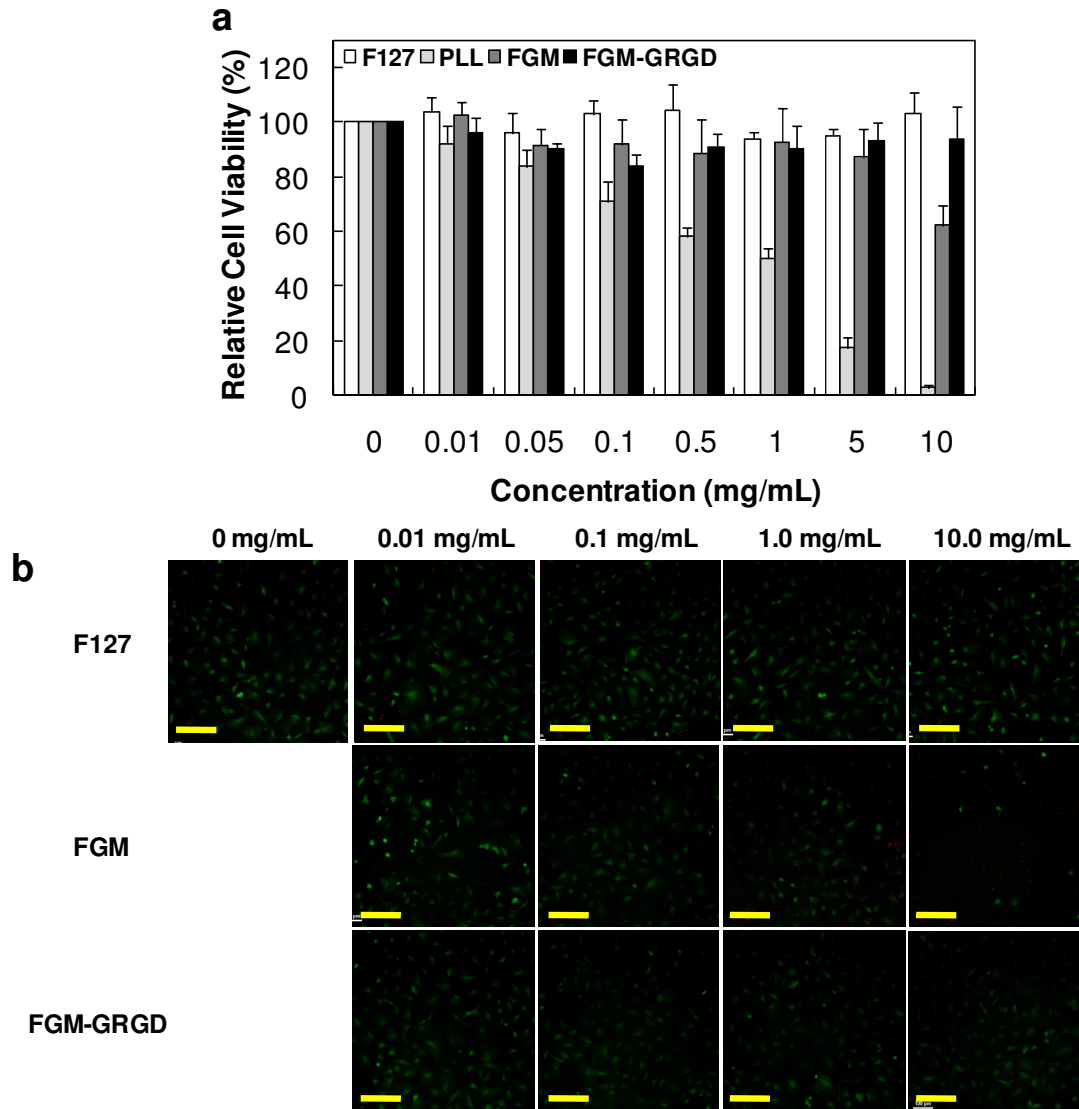

**Figure S6.** Chondrocyte viability in F127, FGM, and FGM-GRGD aqueous solutions as a function of concentration (0.01 ~ 10 mg/mL). (a) Relative cell viability determined by CCK-8. PLL with a molecular weight of 1,000 ~ 5,000 was compared as a control.  $n = 5$ . (b) Confocal microscopic images of monolayer cultured chondrocytes analyzed using a Live/Dead kit. Green and red images indicate live and dead cells, respectively. Scale bar is 200  $\mu\text{m}$ .
